# Supplementary material for: Maintenance with mirvetuximab soravtansine plus bevacizumab vs bevacizumab in FRα-high platinum-sensitive ovarian cancer
Source: PubMed Central journal article supplement — Future Oncol. 2024 Jul 31;20(32):2423–36. doi: 10.1080/14796694.2024.2372241 (PMC11520569; doi:10.1080/14796694.2024.2372241), 2024-07-31
Supplement: IFON_A_2372241_SM0001.pdf [file IFON_A_2372241_SM0001.pdf]

# Maintenance with Mirvetuximab Soravtansine plus Bevacizumab vs Bevacizumab in FR $\alpha$ -High Platinum-Sensitive Ovarian Cancer

David M. O'Malley, MD, Tashanna Myers, MD, Pauline Wimberger, MD, PhD, Toon Van Gorp, MD, PhD, Andres Redondo, MD, PhD, David Cibula, MD, PhD, Shibani Nicum, PhD, Manuel Rodrigues, MD, PhD, Floor J. Backes, MD, Joyce N. Barlin, MD, Sharyn N. Lewin, MD, Peter Lim, MD, Bhavana Pothuri, MD, Elisabeth Diver, MD, Susana Banerjee, MBBS, PhD, Domenica Lorusso, MD, PhD

## Rationale:

- FR $\alpha$**  In ovarian cancer, 72% to 97% of patients have tumors that express FR $\alpha$
- MIRV** Mirvetuximab soravtansine-gynx (MIRV) is an FR $\alpha$ -targeting antibody-drug conjugate that received accelerated US FDA approval in November 2022 for the treatment of FR $\alpha$ -positive platinum-resistant ovarian cancer
- MIRV + BEV** MIRV+bevacizumab demonstrated clinically meaningful activity in patients with platinum-sensitive and platinum-resistant ovarian cancer in the phase 1b/2 FORWARD II trial

## SCREENING AND ENROLLMENT

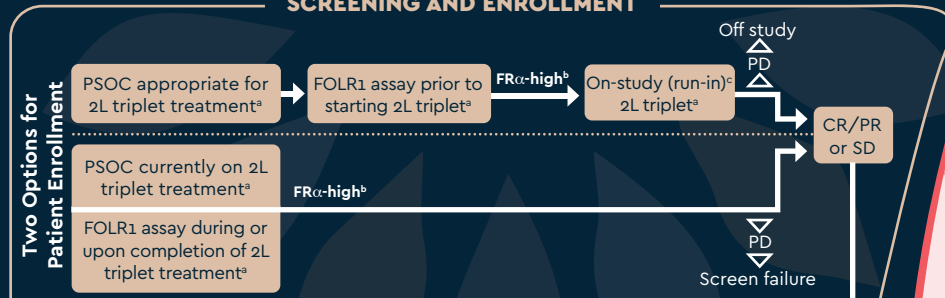

## RANDOMIZATION AND STUDY TREATMENT\*

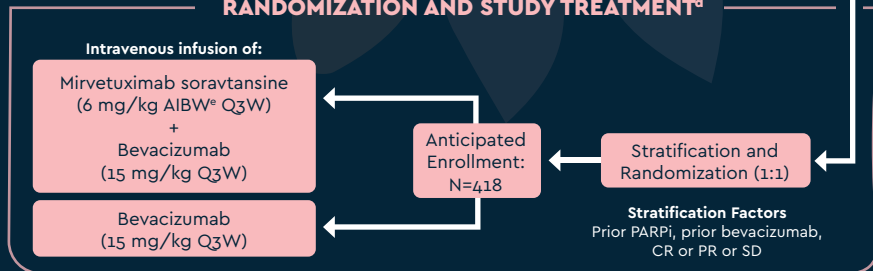

\*Triplet treatment consists of platinum plus chemotherapy plus bevacizumab for planned 6 cycles (minimum 4 and maximum 8 cycles), including at least 3 cycles of bevacizumab.

<sup>b</sup>FR $\alpha$ -high is defined by FR $\alpha$  positivity of  $\geq 75\%$  of tumor membrane staining at  $\geq 2+$  intensity (PS2+).

<sup>c</sup>FR $\alpha$ -high participants who desire to be treated and followed while on their run-in triplet therapy must sign a run-in consent as part of the main consent form if they meet eligibility criteria as assessed by the investigator.

<sup>d</sup>Maintenance treatment must begin  $\leq 12$  weeks from last dose of triplet therapy and within 30 days of randomization. Treatment continues until PD, unacceptable toxicity, withdrawal of consent, death, or study sponsor termination.

<sup>e</sup>AIBW, also known as AdjBW, is calculated as  $\text{kg} + 0.4$  (actual weight - IBW). IBW for females is calculated as  $0.9 \times \text{height (cm)} - 92$ .

# GLORIOSA

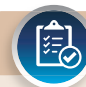

## Key Eligibility Criteria

- ✓ High-grade serous epithelial ovarian cancer, primary peritoneal cancer, or fallopian tube cancer
- ✓ Platinum-sensitive disease (defined as progression  $> 6$  months from last dose of primary platinum therapy)
- ✓ Patients  $\geq 18$  years old
- ✓ FR $\alpha$  positivity detected by IHC with PS2+ intensity among  $\geq 75\%$  of viable tumor cells
- ✓ 1 prior systemic treatment
- ✓ Prior PARPi required if BRCA+
- ✓ CR, PR, or SD after treatment with platinum-based doublet + bevacizumab

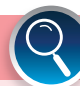

## Outcomes Assessed

**Primary Endpoint:** Investigator-assessed PFS

**Key Secondary Endpoint:** OS

**Other Secondary Endpoints:** Safety and tolerability, PFS2, ORR, DOR, DFS, CA-125 response, patient-reported outcomes

**Abbreviations:** 2L, second-line; AdjBW, adjusted body weight; AIBW, adjusted ideal body weight; BEV, bevacizumab; BRCA, BReast CAncer gene; CA-125, cancer antigen 125; CR, complete response; DFS, disease-free survival; DOR, duration of response; FDA, US Food and Drug Administration; FOLR1, folate receptor 1; FR $\alpha$ , folate receptor alpha; IBW, ideal body weight; IHC, immunohistochemistry; MIRV, mirvetuximab soravtansine-gynx; ORR, objective response rate; OS, overall survival; PARPi, poly (adenosine diphosphate [ADP]-ribose) polymerase inhibitor; PD, progressive disease; PFS, progression-free survival; PFS2, time from date of randomization until second disease progression or death, whichever occurs first; PR, partial response; PS2+, positive staining 2+; PSOC, platinum-sensitive ovarian cancer; Q3W, 3 times per week; SD, stable disease.

**Funding:** This clinical trial is funded by ImmunoGen, Inc.

### Additional Information

- This trial will be performed according to the principles of the Joint ENGOT and GOG Foundation requirements for trials with industry partners. A model C design will be utilized.

### Trial Tracking Information

- ClinicalTrials.gov ID: NCT054445778
- ENGOT.ESGO.org ID: ENGOT-ov76
- GOG.org ID: GOG-3078
